# Supplementary material
Source: Springer Nature journal article supplement (https://www.springermedizin.de/resource/supplementary/12913_2012_2054_MOESM12_ESM.pdf/9529852)

a.

Funnel plot with pseudo 95% confidence limits

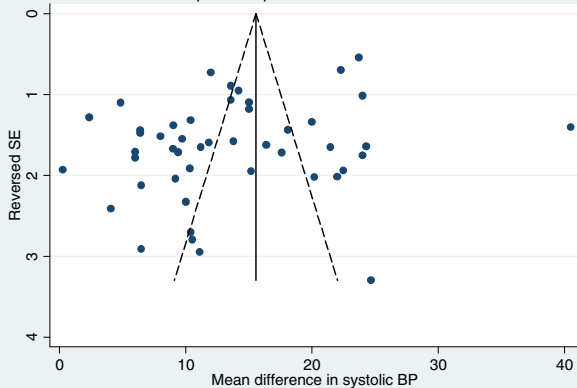

b.

Funnel plot with pseudo 95% confidence limits

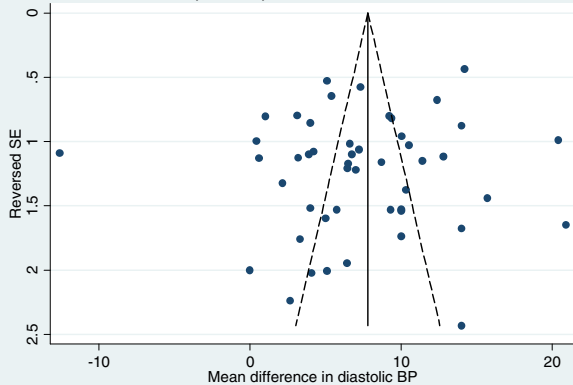

c.

Funnel plot with pseudo 95% confidence limits

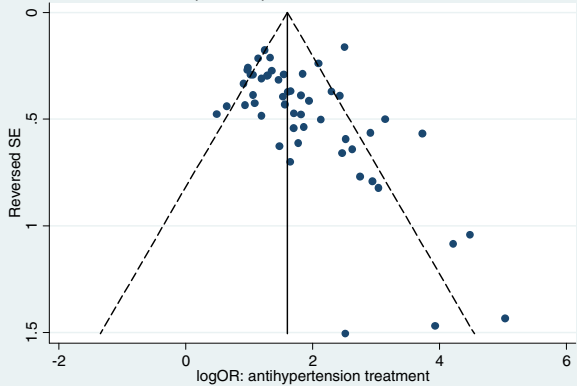

d.

Funnel plot with pseudo 95% confidence limits

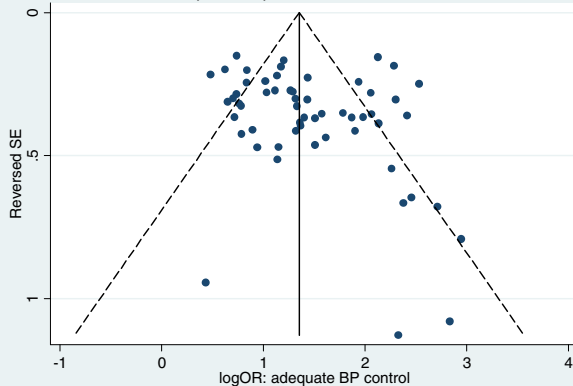

Supplement: MOESM12 [file 9529852]
